# Supplementary material
Source: PubMed Central journal article supplement (PMC6055176)
Supplement: pnas.1803281115.sapp.pdf [file pnas.1803281115.sapp.pdf]

## Supplementary Information for

Induction of oligoclonal CD8 T cell responses against pulmonary metastatic cancer by a phospholipid-conjugated TLR7 agonist

Tadashi Hosoya<sup>\*</sup>, Fumi Sato-Kaneko<sup>\*</sup>, Alast Ahmadi<sup>\*</sup>, Shiyin Yao<sup>\*</sup>, Fitzgerald Lao<sup>\*</sup>, Kazutaka Kitaura<sup>†</sup>, Takaji Matsutani<sup>†</sup>, Dennis A Carson<sup>\*\*‡</sup>, Tomoko Hayashi<sup>\*\*‡</sup>

Corresponding Author: Tomoko Hayashi      [thayashi@ucsd.edu](mailto:thayashi@ucsd.edu)  
Dennis A. Carson      [dcarson@ucsd.edu](mailto:dcarson@ucsd.edu)

This PDF file includes:

Supplementary text  
Figs. S1 to S12  
Tables S1 to S3  
Methods

## Supplementary Information Text

### SI Appendix Figure Legends

#### Fig. S1

Systemic administration of 1V270 inhibits lung metastasis, but not the primary tumor growth

(A) Growth curves of the orthotopically implanted primary tumor in the spontaneous metastasis

model. 4T1 cells ( $5 \times 10^5$ ) were inoculated to both 4<sup>th</sup> mammary pads of BALB/c mice

(n=13/group). 1V270 (20, 80, or 200  $\mu\text{g}/\text{injection}$ ) was i.p. administered on days 7, 10, 14, 17,

21, and 24 as shown in Figure 1A. Tumor growth was measured with a caliper and calculated

using the formula: volume ( $\text{mm}^3$ )=(width)<sup>2</sup> × length/2. (B) Experimental protocol of T cell

depletion. BALB/c mice (n=6-15/group) were i.p. treated with anti-CD8-mAb. (C) Growth curves

of the orthotopically implanted primary tumor in the CD8<sup>+</sup> T cells depleted mice. Data shown are

mean  $\pm$  SEM and representative of two independent experiments showing similar data.

#### Fig. S2

Representative gating process of CD8<sup>+</sup> T cells in TILs by flow cytometry

(A) Representative gating process of CD8<sup>+</sup> T cells (CD45<sup>+</sup>CD3<sup>+</sup>CD8<sup>+</sup>). (B) Representative flow

cytometric plots of CD8<sup>+</sup> T cells on day 26 following CD8<sup>+</sup> T cell depletion. Over 80 % CD8<sup>+</sup> T

cell population was depleted both in vehicle and 1V270 treated groups.

#### Fig. S3

1V270 therapy increases frequency of commonly shared clones between individuals

(A) The clonality index (1-normalized Shannon index) of CD8<sup>+</sup> T cells infiltrating to left side of

the secondarily challenged tumor were plotted against both sides of tumor volume in the no-

tumor exposed mice. The correlation was evaluated by a Pearson's correlation test ( $R^2=0.15$ ,  $p=0.61$ ). (B) The Venn diagram of "shared clones" among the individual mice in the same group. Based on the sequence of CDR3 region, number of TCR clones shared between individual mice were counted. The shared clone was defined as the TCR clone consisting of identical V and D genes and amino acid sequence of CDR3 shared among 3 or more mice in the groups. (C) The percentage frequency of shared clones in the total reads in TILs. The frequency was calculated by dividing the sum of number of sequence reads from shared clones by the total number of reads. Each dot represents the frequency of the shared clones of either TCR $\alpha$  (green) or TCR $\beta$  (blue) in the individual mice.

#### **Fig. S4**

Intraperitoneal administration of 1V270 activates local dendritic cells in the lungs

(A) Representative gating process of CD11c<sup>+</sup>MHC classII<sup>+</sup> dendritic cells in the lungs. (B) BALB/c mice (n=5/group) were treated with 1V270 (200  $\mu$ g/injection) on day -1 and then tumor cells were i.v. administered on day 0. Seven days later, single cell suspensions derived from the lungs were stained for CD11c<sup>+</sup>MHC class II<sup>+</sup> dendritic cells (left panel). The cells were further assayed for costimulatory molecules (CD80, and CD86) expression (right panel). Each dot indicates an individual mouse and horizontal bars indicate means. \* $P<0.05$  by Kruskal-Wallis test with Dunn's *post hoc* test comparing treatment groups against vehicle.

#### **Fig. S5**

In vivo imaging in the IV metastasis model

(A) In vivo imaging protocol in IV metastasis model. (B) Representative of lung tumor signals by IVIS in Figure4D.

### **Fig. S6**

1V270 therapy recruits innate immune cells to the lungs

(A-C) Representative flow cytometric plots and gating process of immune cells in the lungs.

BALB/c mice (n=6-7/group) were treated with 1V270 (200 µg/injection) on day -1 and then tumor cells were i.v. administered on day 0. On day 7, single cell suspensions derived from the lungs were stained for (A) NK cells (CD45<sup>+</sup>CD3<sup>-</sup>NKp46<sup>+</sup>CD49<sup>+</sup>), (B) M-MDSCs (CD45<sup>+</sup>CD11b<sup>+</sup>Ly6G<sup>-</sup>Ly6C<sup>high</sup>) and (C) PMN-MDSCs (CD45<sup>+</sup>CD11b<sup>+</sup>Ly6G<sup>+</sup>) were analyzed by flow cytometric assay. (C) Frequencies of M-MDSCs and PMN-MDSCs were compared between 1V270 treated and vehicle-treated mice. Each dot indicates an individual mouse and horizontal and vertical bars indicate means ± SEM. Data are representative of 2 independent experiments showing similar results. Mann-Whitney U test was used to compare treatment groups against the vehicle group. \*P<0.05, \*\*P<0.01.

### **Fig. S7**

Antibody-mediated depletion of NK cells reverses inhibition of tumor cell colonization by 1V270 therapy in the early phase

(A) Experimental protocol of NK cell depletion. Anti-asialo GM1 rabbit polyclonal Ab (aGM1) or rabbit IgG polyclonal Ab was injected on days -4, -1, 3, and 10. 1V270 (200 µg/injection) was administered on day -1 and  $2 \times 10^4$  4T1 cells were i.v. injected on day 0. (B) Representative flow cytometric plots of NK cell frequency in the lung on day 14. (C) Representative of lung tumor signals of NK cell depleted mice by IVIS in Figure 4F.

### **Fig. S8**

Intraperitoneal 1V270 treatment activates CD11c<sup>+</sup> DCs in mediastinal LN but not DCs in cervical and inguinal LNs

1V270 (200 µg/injection) was administered one day prior to i.v. administration of 4T1 cells ( $2 \times 10^4$ ). Mice were euthanized on days 7, 14, and 22. (A) Total numbers of CD11c<sup>+</sup> DC in the medicinal LNs were compared between 1V270 and vehicle treatments. \*P=0.0004 by two-way ANOVA followed by Bonferroni's multiple comparison test. (B, C and D) Total (B), CD80<sup>+</sup> (C), or CD86<sup>+</sup> (D) CD11c<sup>+</sup> DC in the medicinal, cervical, and inguinal LNs on day 7 were compared between 1V270 and vehicle treatments. (E and F) Total numbers of CD8<sup>+</sup> T cells (E) and PD-1<sup>+</sup> CD8<sup>+</sup> T cells (F) in the medicinal, cervical, and inguinal LNs on day 7 were compared between 1V270 and vehicle treatments were plotted. \*P<0.05 by Mann-Whitney U test. Data shown are representative of two independent experiments showing similar trends.

### **Fig. S9**

Minimal body weight loss induced by administration of therapeutic dose of 1V270.

A) C57BL/6 mice were i.v. or i.p. injected with 71 mg/kg (MTD) 1V270 and body weight was monitored. B) BALB/c mice were administered 20 and 200 nmol/25g mouse (corresponding to 0.8, and 8 mg/kg, respectively) 1V270 and body weight was measured next day. C)  $2 \times 10^4$  4T1 cells were i.v. injected on day 0 and 1V270 therapy (8, 0.8, and 0.08 mg/kg, corresponding to 200, 20, and 2 nmol/25g, respectively) was administered on days -1, 7, 10, 14, 17 and 21. None of these doses significantly caused weight loss. D) Wild type C57BL/6 mice or *Tlr7*<sup>-/-</sup> mice were i.v. injected with 71 mg/kg 1V270 and body weight was monitored. \*P<0.05 by two-way ANOVA and Dunn's post hoc test.

### **Fig. S10**

Toll-like receptor 7 expression in 4T1, B16, LLC and 3T3 cells

Expression of TLR7 in the cell lines used in this study was assessed by quantitative RT-PCR.

### **Fig. S11**

Systemic administration of 1V270 induces significantly lower levels of cytokine induction by systemically administrated 1V270 and 1V136

BALB/c mice (n=5) were i.p. administered 1V270 (200 $\mu$ g=185 nmol/injection) or 1V136 (58  $\mu$ g =185 nmol/injection) and sera were collected 2, 4, 6, and 24 h following the administration. The levels of TNF $\alpha$ , IL-12, and IP-10 were measured by Luminex assay. \*P<0.05, \*\*P<0.01 by two-way ANOVA using a Bonferroni *post hoc* test comparing treatment groups.

**Fig. S12**

The correlation between the tumor signal in the lung at day 10, and the number of lung nodules or overall survival

(A) BALB/c mice (n=5) were injected with  $2 \times 10^4$  4T1 cells on day 0. Tumor cell signals were monitored using IVIS. Tumor signals on day 10 were plotted with the number of lung tumor nodules examined on day 21. (B) BALB/c mice (n=8 /group) were injected with  $2 \times 10^4$  4T1 cells on day 0. Tumor signals were monitored using IVIS. Tumor signals on day 10 were plotted with survival (days) of individual mice. The representative tumor signal images by IVIS for (A) and (B) are shown at right. The correlation was evaluated by a Pearson's correlation test.

## **SI Appendix, Method**

### **4T1 breast tumor models**

$5 \times 10^5$  4T1 cells were inoculated in both sides of the 4<sup>th</sup> mammary pads of female BALB/c mice purchased from Charles River Laboratories (Wilmington, MA). Tumor length and width were recorded, and tumor volumes were calculated using the formula: volume ( $\text{mm}^3$ ) =  $(\text{width})^2 \times \text{length} / 2$ . On day 28, mice were euthanized and the lungs were stained with intratracheally injected India ink and destained in Fekete's solution to count tumor nodules. In the experimental metastasis model,  $2 \times 10^4$  4T1 cells were i.v. injected. On day 21, mice were euthanized and tumor nodules in lungs were counted as described above. In the secondary challenge experiment, 1V270 treated- mice without tumor signals in the lungs on day 21 of the experimental metastasis protocol were included.  $5 \times 10^5$  4T1 cells were inoculated in both sides of the 4<sup>th</sup> mammary pads. Tumor length and width were recorded, and tumor volumes were calculated similar with spontaneous metastasis model.

### **Histologic analysis**

Lungs were fixed with 10% formalin for overnight, dehydrated and embedded in paraffin on the Excelsior ES tissue processor (Thermo Scientific) and sectioned at 5  $\mu\text{m}$  thickness on a rotary microtome. Antigen retrieval was performed in Citrate buffer, pH 6.0, heated to 98C for 8 minutes and cooled at room temperature for 20 minutes. The sections were stained on a Lab Vision 360 automated immunostaining instrument (Thermo Scientific) using a 2 step immunoperoxidase protocol. Briefly, the slides were blocked for endogenous peroxidase activity, washed and incubated with protein blocking buffer, 5% normal donkey serum in TBS for 10 minutes. The primary antibodies, both rabbit polyclonal, CD45 (ab10558, AbCam, used at 1  $\mu\text{g}/\text{ml}$  diluted in 5% NDS) and CD3 (ab16669 from AbCam at a 1:100 dilution) were incubated for 1 hour at room temperature. After washing in TBS-tween, the slides were incubated with the secondary antibody - HRP-Donkey F(ab')<sub>2</sub> anti rabbit (Jackson ImmunoResearch Laboratories diluted 1:200) for 30 minutes at room temperature, washed and reacted with DAB as the brown color

substrate, hematoxylin was used the counterstain. Antibody details are shown in Supplemental Table 2. Images were acquired using Axio Imager Zeiss microscope (Zeiss, Thornwood, NY).

### **Flow cytometric analysis**

To make the single cell suspensions, tumors were dissociated using the mouse tumor dissociation kit (Miltenyi Biotec, San Diego, CA) and the gentle MACS Octo Dissociator according to the manufacture's protocol. Single cell suspensions of spleens, lungs and mLN were prepared in Hank's Balanced Salt Solution (HBSS) supplemented with 20 µg/mL DNase I (Worthington, Lakewood, NJ) and 0.6 mg/mL collagenase type I (Worthington). Total cell number was counted by the ViaCount assay (MilliporeSigma, Darmstadt, Germany). Dead cells were excluded by propidium iodide staining.

### **NK cells or CD8<sup>+</sup> cell depletion *in vivo***

For NK cell depletion, 50 µL of anti-asialo GM1 rabbit polyclonal antibody (Wako, Richmond, VA) or rabbit IgG polyclonal antibody (Millipore, Temecula, CA) was injected on days -1, 1, 5, 9, 13, and 17. Mouse anti-CD8 (clone 2.43) and isotype control Ab (clone LFA-2) were purchased from BioXcell (West Lebanon, NH). Anti-CD8 and isotype control (200µg/dose) were i.p administered on days 5, 8, 11, 14,16, 19, and 23 to mice.

### **Safety assessment of 1V270 *in vivo***

Wild type C57BL/6 and BALB/c were purchased from Charles Rive Laboratories. Tlr7 deficient mice (C57BL/6 background) were kindly gifted by Dr Shizuo Akira and bred and maintained by the UCSD Animal Care Program. In the single dose toxicity study, wild type Tlr7 deficient C57BL/6 (males and females) were i.p. injected with MTD (71 mg/kg), or effective doses (0.8 or 8 mg/kg) 1V270 on day 0 and body weight was monitored. In the repeated dose safety study, BALB/c mice were injected with  $2 \times 10^4$  4T1 cells on day 0 and 1V270 therapy (8, 0.8, and 0.08 mg/kg, corresponding 200, 20, and 2 nmol/25g, respectively) was administered on days -1, 7, 10, 14, 17 and 21 and body weight was monitored. For complete blood count (CBC) and serum chemistry study, BALB/c mice (female 7-8 week old) were i.p. injected with 20, or



200nmol/injection 1V270 and blood was collected 18 h later using EDTA coated collection tubes. CBC and serum chemistry studies were performed by STAT Veterinary Laboratory (San Diego CA). Blood chemistry was assayed by ACP Diagnostic Veterinary Laboratory (UCSD). In the cytokine release study, the sera were collected from mice receiving 200 nmol of 1V136, 1V270 or vehicle 2, 4, 6, and 24 h after i.p. administration (1). Cytokine levels in sera were determined by Luminex bead assays (MILLIPLEX™ MAP kit, Millipore, Billerica, MA).

#### **Assay for off-target binding of 1V270**

Off target binding assessment of 1V270 was performed by Eurofin Pharma Discovery Service (St Charles, MO).

#### **Statistical analysis**

Means and standard errors of means (SEM) are shown in other analyses. In dot plots, each dot represents a tumor, a spleen, or a lymph node from an individual mouse and the horizontal and vertical bars indicate mean and mean  $\pm$  SEM. Mann-Whitney test was used to compare two groups. Using tumor volumes collected over all time points, two-way repeated measures ANOVA was used to compare different groups, with pair-wise contrasts made at the final time point using a Bonferroni *post hoc* test. To compare cross-sectional outcomes among more than two groups, Kruskal-Wallis tests with Dunn's *post hoc* test were applied. Correlations between tumor volumes and TCR repertoire analysis data were analyzed using a Pearson's correlation test, pooling data across the different treatment groups. Analysis of covariance (sometimes on the log scale) was used to test whether the correlation was mediated by differences among the treatment groups in both mean immune marker level and tumor volumes.  $p < 0.05$  were considered statistically significant. Prism 6 (GraphPad Software, San Diego, CA) statistical software was used to carry out these analyses.

#### **The laboratory operation and ethics statement**

This study was performed using established laboratory protocols including tumor dissociation, processing, freezing, storage and thawing of cells as well as the staining procedure, data

acquisition and gating strategy. The studies involving animal use were carried out in strict accordance with the recommendations in the Guide for the Care and Use of Laboratory Animals of the National Institutes of Health. The protocol was approved by the Institutional Animal Care and Use Committee of University of California, San Diego (PHS Animal Welfare Assurance Number: A3033-01; Protocol Numbers: S00028, and S05016). Mice were sacrificed by CO<sub>2</sub> inhalation followed by cervical dislocation. All efforts were made to minimize suffering during the procedures in this project.

#### Reference

1. Chan M, *et al.* (2009) Synthesis and immunological characterization of toll-like receptor 7 agonistic conjugates. *Bioconj Chem* 20:1194-1200.

A

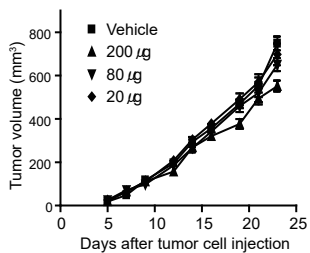

B

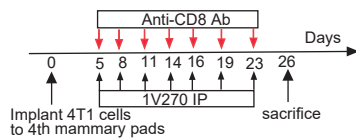

C

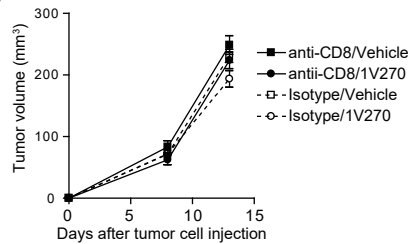

A

Gating strategy for T cell subset

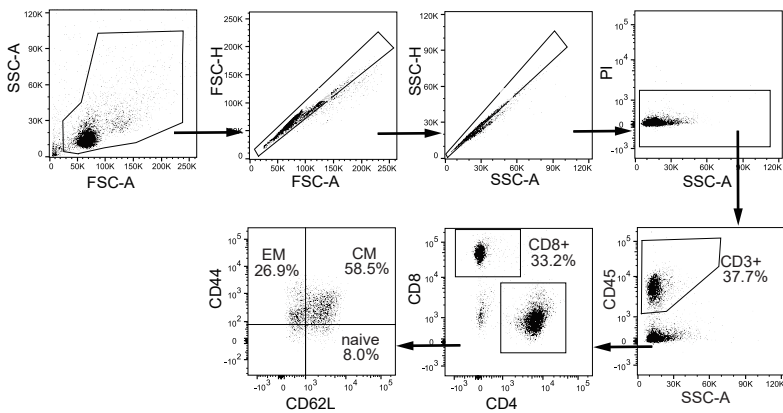

B

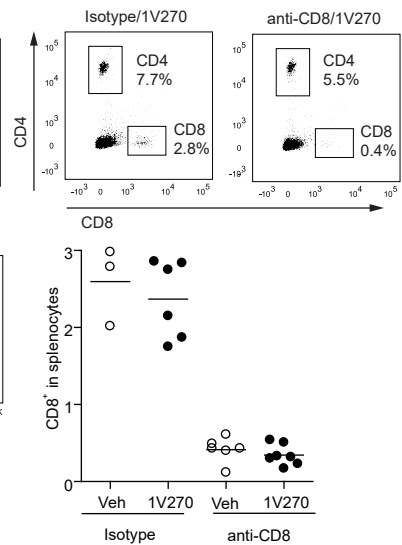

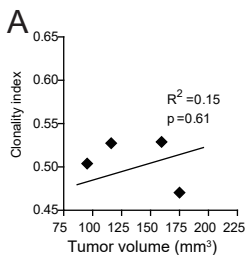

**B**  
Number of TCR clones shared among 3 or more mice

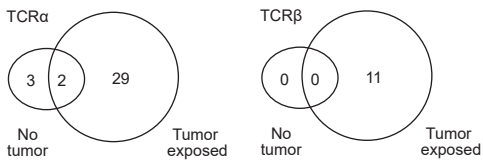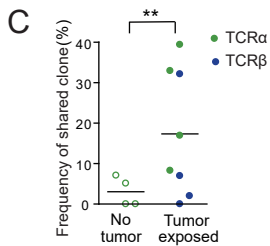

# A Gating strategy for dendritic cells

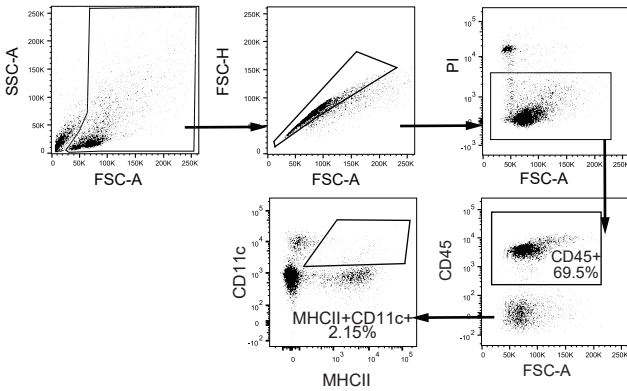

7 day after tumor injection in lung FACS

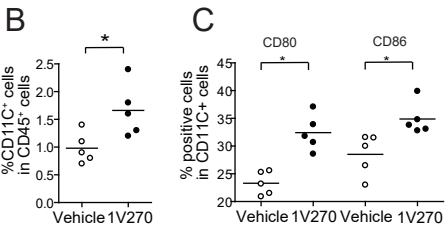

A

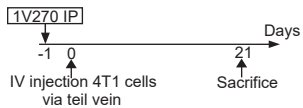

B

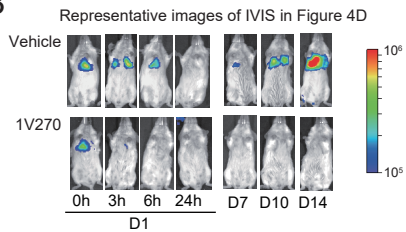

## A Gating strategy for NK cells

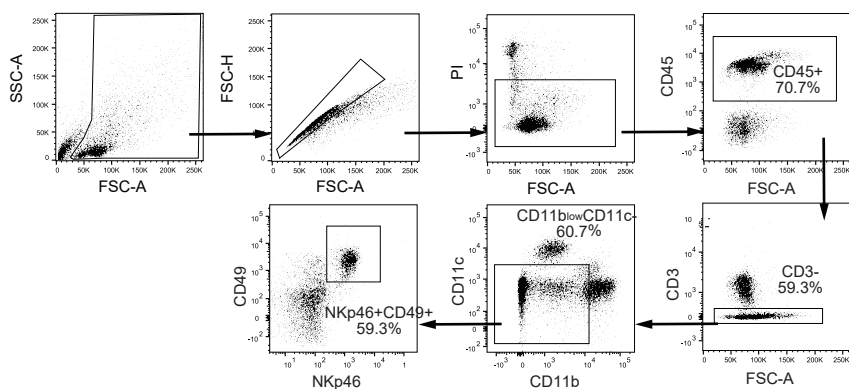

## B Gating strategy for M-MDSCs and PMN-MDSCs

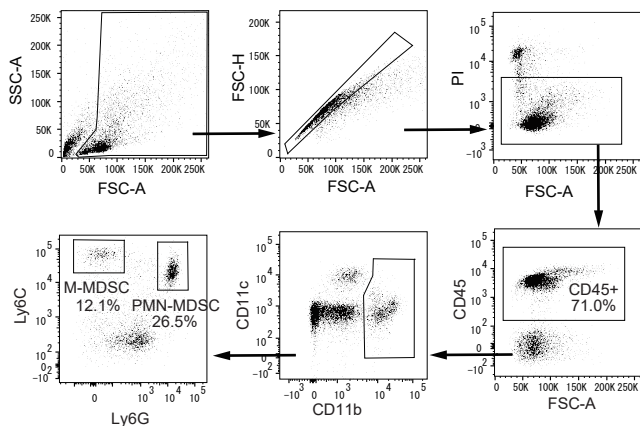

## C 7 day after tumor injection in lung FACS

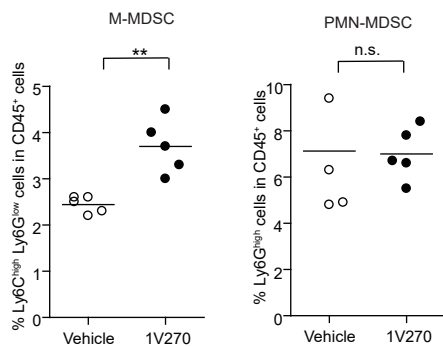



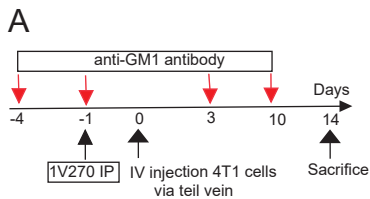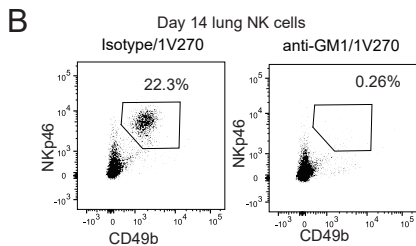

**C**

Representative images of IVIS in figure 4F

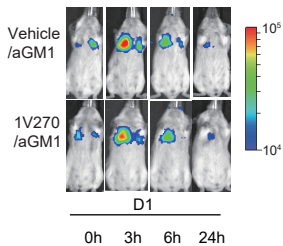

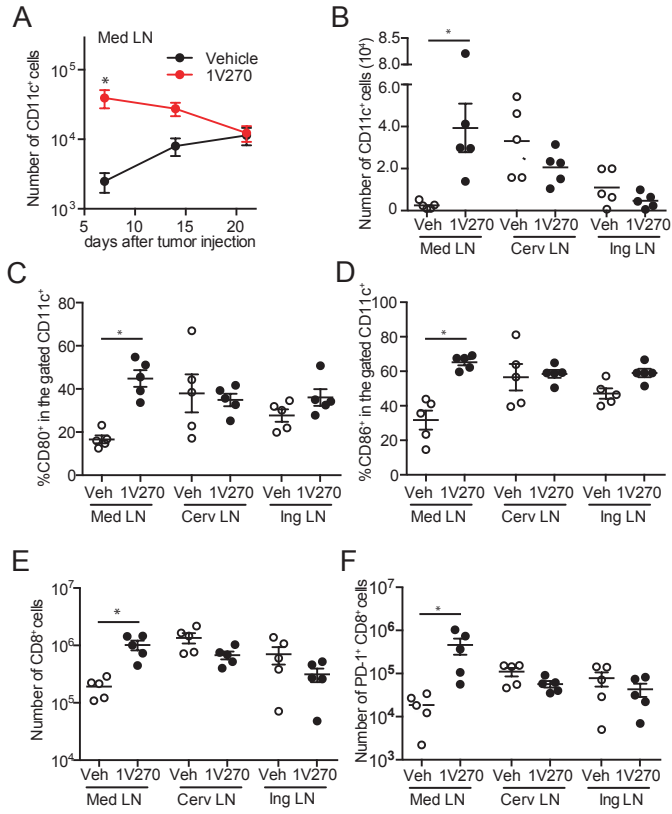

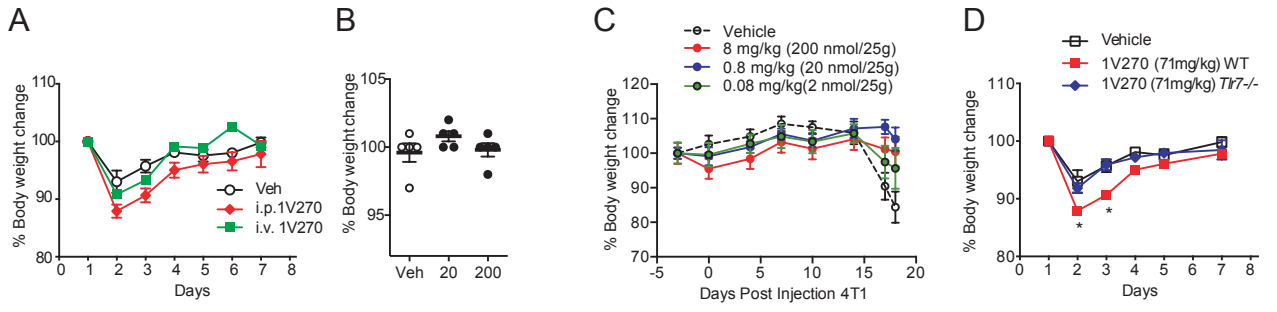

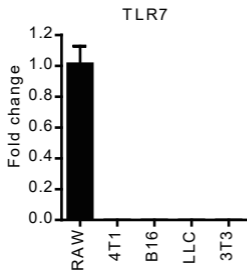

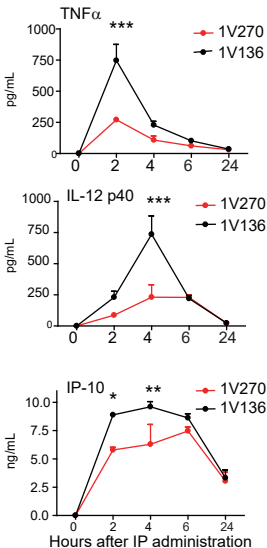

A

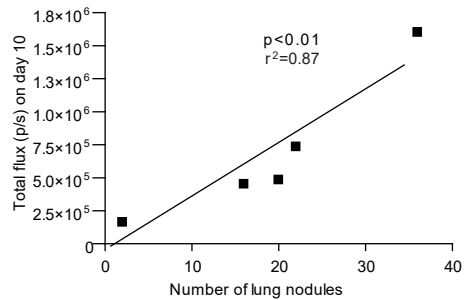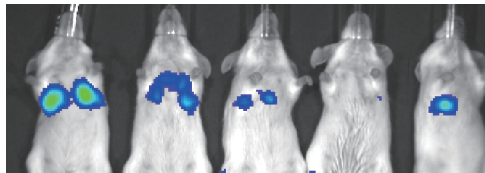

|                        |          |          |          |          |          |
|------------------------|----------|----------|----------|----------|----------|
| Total flux at day10    | 1.60E+06 | 7.34E+05 | 4.51E+05 | 1.62E+05 | 4.84E+05 |
| Number of lung nodules | 36       | 22       | 16       | 2        | 20       |

B

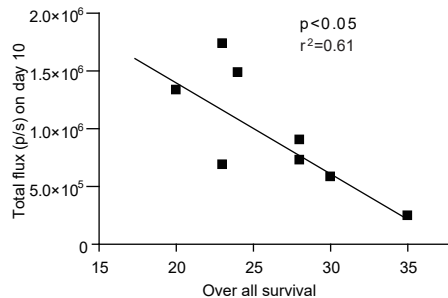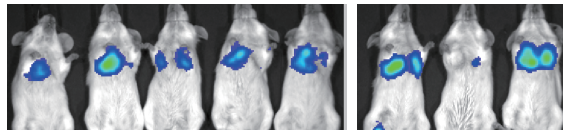

|                     |          |          |          |          |          |          |          |          |
|---------------------|----------|----------|----------|----------|----------|----------|----------|----------|
| Total flux at day10 | 5.8.E+05 | 1.3.E+06 | 6.9.E+05 | 7.3.E+05 | 9.0.E+05 | 1.5.E+06 | 2.5.E+05 | 1.7.E+06 |
| Overall survival    | 30       | 20       | 23       | 28       | 28       | 24       | 35       | 23       |

SI Appendix Table1 Antibodies used in flow cytometry analysis

| <b>Antibody</b>   | <b>Color</b> | <b>Cat#</b> | <b>Clone</b> | <b>Host/Isotype</b>      | <b>Vendor</b>  |
|-------------------|--------------|-------------|--------------|--------------------------|----------------|
| CD3               | PE/Cy7       | 552774      | 145-2c11     | Armenian Hamster IgG1, κ | BD Biosciences |
| CD4               | APC          | 17-0042     | RM4-5        | Rat IgG2a, κ             | eBioscience    |
| CD8a              | e450         | 48-0081     | 53-6.7       | Rat IgG2a, κ             | eBioscience    |
| CD11b             | FITC         | 11-0112     | M1/70        | Rat IgG2b, κ             | eBioscience    |
| CD11b             | e450         | 48-0112     | M1/70        | Rat IgG2b, κ             | eBioscience    |
| CD11c             | APC/Cy7      | 117324      | N418         | Armenian Hamster IgG     | Biolegend      |
| CD44              | APC/Cy7      | 103028      | IM7          | Rat IgG2b, κ             | Biolegend      |
| CD45              | PE/Cy7       | 103114      | 30-F11       | Rat IgG2b, κ             | Biolegend      |
| CD49b             | PE           | 553858      | DX5          | Rat Lewis IgM, κ         | BD Biosciences |
| CD62L             | FITC         | 11-0621     | MEL-14       | Rat IgG2a, κ             | eBioscience    |
| CD80              | FITC         | 104706      | 16-10A1      | Armenian Hamste IgG      | Biolegend      |
| CD86              | PE           | 12-0862     | GL1          | Rat IgG2a, κ             | eBioscience    |
| CD279(PD-1)       | PE           | 135205      | 29F.1A12     | Rat IgG2a, κ             | Biolegend      |
| CD335(NKP40)      | FITC         | 560756      | 29A1.4       | Rat IgG2a, κ             | BD Biosciences |
| F4/80             | FITC         | 11-4801     | BM8          | Rat IgG2a, κ             | eBioscience    |
| LY6C              | Pacific blue | 128014      | HK1.4        | Rat IgG2c,κ              | Biolegend      |
| LG6G              | APC          | 127614      | 1A8          | Rat IgG2a, κ             | Biolegend      |
| MHC Class2(I-ad ) | APC          | 17-5323     | AMS-32.1     | Mouse IgG2b, k           | eBioscience    |
| Granzyme B        | FITC         | 515403      | GB11         | Mouse IgG1, κ            | BD Biosciences |
| IFN $\gamma$      | APC          | 17-7311     | XMG1.2       | Rat IgG1, κ              | eBioscience    |

SI Appendix Table 2. Complete blood counts and blood chemistry

|                      | Vehicle    | 1V270 20nmol | 1V270 200nmol | Reference range | Unit                 |
|----------------------|------------|--------------|---------------|-----------------|----------------------|
| WBC                  | 5.2 ± 0.4  | 5.5 ± 1.4    | 5.3 ± 0.3     | 5.4-16          | ×10 <sup>3</sup> /μL |
| RBC                  | 10.7 ± 0.2 | 10.4 ± 0.1   | 9.7 ± 0.3*    | 6.7-12.5        | ×10 <sup>6</sup> /μL |
| HCT                  | 51 ± 1     | 50 ± 1       | 47 ± 2        | 32-54           | %                    |
| MCV                  | 48 ± 0.3   | 48 ± 0.6     | 48 ± 0.7      | 31-62           | fL                   |
| MCH                  | 16 ± 0.2   | 16 ± 0.1     | 16 ± 0.1      | n.s.            | pg                   |
| MCHC                 | 33.4 ± 0.5 | 33.6 ± 0.5   | 33.5 ± 0.6    | 22-35.5         | g/dL                 |
| Platelet             | 668 ± 96   | 762 ± 46     | 769 ± 47      | 500-1500        | ×10 <sup>3</sup> /μL |
| Neutrophils          | 865 ± 136  | 1528 ± 392   | 1508 ± 147*   | 600-6100        | /μL                  |
| % Neutrophils        | 17 ± 1     | 27 ± 2*      | 29 ± 2*       | 8-43            | %                    |
| Lymphocytes          | 4062 ± 255 | 3735 ± 933*  | 3549 ± 299*   | 3300-6640       | /μL                  |
| % Lymphocytes        | 79 ± 2     | 69 ± 2*      | 67 ± 3*       | 55-95           | %                    |
| Monocytes            | 69 ± 9     | 80 ± 14      | 112 ± 25      | 0-1500          | /μL                  |
| Alkaline phosphatase | 186 ± 5    | 127 ± 9*     | 125 ± 8*      | n.s.            | unit/L               |
| Alanine transaminase | 46 ± 4     | 43 ± 3       | 45 ± 5        | n.s.            | unit/L               |
| Total protein        | 5.7 ± 0.1  | 5.6 ± 0.1    | 5.6 ± 0.1     | n.s.            | g/dL                 |
| Albumin              | 4.4 ± 0.1  | 4.0 ± 0.1    | 3.9 ± 0.1*    | n.s.            | g/dL                 |
| Globulin             | 1.4 ± 0.1  | 1.6 ± 0.1    | 1.7 ± 0.1     | n.s.            | g/dL                 |
| Amylase              | 664 ± 32   | 540 ± 17     | 468 ± 16*     | n.s.            | mg/dL                |
| Blood urea nitrogen  | 14 ± 1     | 17 ± 1       | 13 ± 1        | n.s.            | mg/dL                |

- p<0.05 compared to vehicle treated mice by one-way ANOVA with Dunn's multiple comparison test.
- n.s.; not specified



SI Appendix Table 3. Off Target Receptor Binding of 1V270

| Target Compounds <sup>*1</sup>             | Species | Incubation temperature (°C) | Incubation time (min) | 1V270 <sup>*2</sup> |
|--------------------------------------------|---------|-----------------------------|-----------------------|---------------------|
| CYP450, 1A2 <sup>*3</sup>                  | human   | 37                          | <b>30</b>             | 3                   |
| CYP450, 2C19 <sup>*3</sup>                 | human   | 37                          | 45                    | -2                  |
| CYP450, 2C9 <sup>*3</sup>                  | human   | 37                          | 45                    | -1                  |
| CYP450, 2D6 <sup>*3</sup>                  | human   | 37                          | 45                    | 2                   |
| CYP450, 3A4 <sup>*3</sup>                  | human   | 37                          | 30                    | -3                  |
| Adenosine A <sub>1</sub>                   | human   | 25                          | 90                    | -1                  |
| Adenosine A <sub>2A</sub>                  | human   | 25                          | 90                    | 6                   |
| Adenosine A <sub>3</sub>                   | human   | 25                          | 60                    | 8                   |
| Adrenergic a <sub>1A</sub>                 | rat     | 25                          | 60                    | 7                   |
| Adrenergic a <sub>1B</sub>                 | rat     | 25                          | 60                    | -3                  |
| Adrenergic a <sub>1D</sub>                 | human   | 25                          | 60                    | 18                  |
| Adrenergic a <sub>2A</sub>                 | human   | 25                          | 60                    | 25                  |
| Adrenergic b <sub>1</sub>                  | human   | 25                          | 120                   | 5                   |
| Adrenergic b <sub>2</sub>                  | human   | 25                          | 60                    | 11                  |
| Androgen (Testosterone) AR                 | rat     | 4                           | 240                   | <b>99</b>           |
| Bradykinin B <sub>1</sub>                  | human   | 25                          | 60                    | 1                   |
| Bradykinin B <sub>2</sub>                  | human   | 25                          | 60                    | 9                   |
| Calcium Channel L-Type, Benzothiazepine    | rat     | 4                           | 180                   | 1                   |
| Calcium Channel L-Type, Dihydropyridine    | rat     | 25                          | 90                    | 8                   |
| Calcium Channel N-Type                     | rat     | 4                           | 30                    | -22                 |
| Cannabinoid CB <sub>1</sub>                | human   | 37                          | 90                    | -7                  |
| Dopamine D <sub>1</sub>                    | human   | 37                          | 120                   | 2                   |
| Dopamine D <sub>24</sub>                   | human   | 37                          | 120                   | 10                  |
| Dopamine D <sub>3</sub>                    | human   | 37                          | 120                   | 3                   |
| Dopamine D <sub>4.2</sub>                  | human   | 25                          | 120                   | 10                  |
| Endothelin ET <sub>A</sub>                 | human   | 37                          | 120                   | -19                 |
| Endothelin ET <sub>B</sub>                 | human   | 25                          | 120                   | 12                  |
| Epidermal Growth Factor (EGF)              | human   | 25                          | 60                    | 11                  |
| Estrogen ER <sub>α</sub>                   | human   | 25                          | 120                   | 0                   |
| GABA <sub>A</sub> , Flunitrazepam, Central | rat     | 25                          | 120                   | 12                  |
| GABA <sub>A</sub> , Muscimol, Central      | rat     | 4                           | 10                    | 8                   |
| GABA <sub>B1A</sub>                        | human   | 25                          | 180                   | -20                 |
| Glucocorticoid                             | human   | 25                          | 120                   | 7                   |
| Glutamate, Kainate                         | rat     | 4                           | 60                    | 10                  |
| Glutamate, NMDA, Agonism                   | rat     | 4                           | 20                    | 1                   |
| Glutamate, NMDA, Glycine                   | rat     | 4                           | 30                    | 16                  |
| Glutamate, NMDA, Phencyclidine             | rat     | 25                          | 45                    | 17                  |
| Histamine H <sub>1</sub>                   | human   | 25                          | 180                   | 8                   |
| Histamine H <sub>2</sub>                   | human   | 25                          | 120                   | 34                  |
| Histamine H <sub>3</sub>                   | human   | 25                          | 120                   | -4                  |
| Imidazoline I <sub>2</sub> , Central       | rat     | 25                          | 30                    | 23                  |
| Interleukin IL-1                           | mouse   | 37                          | 120                   | 2                   |
| Leukotriene, Cysteinyl CysLT <sub>1</sub>  | human   | 25                          | 30                    | 4                   |
| Melatonin MT <sub>1</sub>                  | human   | 25                          | 180                   | 1                   |

|                                                     |        |    |        |          |
|-----------------------------------------------------|--------|----|--------|----------|
| Muscarinic M <sub>1</sub>                           | human  | 25 | 120    | 6        |
| Muscarinic M <sub>2</sub>                           | human  | 25 | 120    | 0        |
| Muscarinic M <sub>3</sub>                           | human  | 25 | 120    | 2        |
| Neuropeptide Y Y <sub>1</sub>                       | human  | 37 | 60     | 1        |
| Neuropeptide Y Y <sub>2</sub>                       | human  | 37 | 120    | -13      |
| Nicotinic Acetylcholine                             | human  | 25 | 60     | 2        |
| Nicotinic Acetylcholine $\alpha$ 1, Bungarotoxin    | human  | 25 | 120    | 0        |
| Opiate $\delta$ 1 (OP1, DOP)                        | human  | 25 | 60     | -8       |
| Opiate $\kappa$ (OP2, KOP)                          | human  | 25 | 60     | 2        |
| Opiate $\mu$ (OP3, MOP)                             | human  | 25 | 60     | 6        |
| Phorbol Ester                                       | mouse  | 25 | 60     | -8       |
| Platelet Activating Factor (PAF)                    | human  | 25 | 180    | -8       |
| Potassium Channel [K <sub>ATP</sub> ]               | human  | 25 | 120    | 6        |
| Potassium Channel hERG                              | human  | 25 | 60     | -1       |
| Prostanoid EP <sub>4</sub>                          | human  | 25 | 120    | 3        |
| Purinergic P <sub>2x</sub>                          | rabbit | 25 | 30     | 24       |
| Purinergic P <sub>2g</sub>                          | rat    | 25 | 60     | 17       |
| Rolipram                                            | rat    | 4  | 60     | 7        |
| Serotonin (5-Hydroxytryptamine) 5-HT <sub>1A</sub>  | human  | 25 | 60     | -8       |
| Serotonin (5-Hydroxytryptamine) 5-HT <sub>2B</sub>  | human  | 37 | 60     | -6       |
| Serotonin (5-Hydroxytryptamine) 5-HT <sub>3</sub>   | human  | 37 | 60     | -2       |
| Sigma s1                                            | human  | 37 | 240    | 12       |
| Sodium Channel, Site 2 289593                       | rat    | 37 | 60     | 0        |
| Tachykinin NK <sub>1</sub>                          | human  | 4  | 90     | 7        |
| Thyroid Hormone                                     | rat    | 4  | 18 hrs | 3        |
| Transporter, Dopamine (DAT)                         | human  | 4  | 180    | <b>2</b> |
| Transporter, GABA                                   | rat    | 25 | 20     | 6        |
| Transporter, Norepinephrine (NET)                   | human  | 4  | 180    | <b>1</b> |
| Transporter, Serotonin (5-Hydroxytryptamine) (SERT) | human  | 25 | 60     | 5        |

\*1; Assay were performed in duplicates. The values are average of the duplicate data.

\*2; 10  $\mu$ M

\*3; Activities of cytochrome (CYP 450) isozyme were determined by spectrofluorimetric quantitation of 3-cyano-7-hydroxycoumarin. Other target compounds were studied using the radioligand assays.

\*4: Bold letter indicates  $\geq$  50% inhibition.
